# Supplementary material for: How the toxicity of nanomaterials towards different species could be simultaneously evaluated: a novel multi-nano-read-across approach
Source: Royal Society of Chemistry journal article supplement (doi:10.1039/c7nr05618d), 2017-11-08
Supplement: c7nr05618d1.xlsx [file c7nr05618d1.xlsx]

## Sheet: Title
Supporting Information
How toxicity of nanomaterials towards different species could be simultaneously evaluated: Novel multi-nano-read-across approach
Natalia Sizochenko,a,b,c Alicja Mikolajczyk,a,b Karolina Jagiello,a Tomasz Puzyn,a Jerzy Leszczynskib† and Bakhtiyor Rasulevb,c†
a. Laboratory of Environmental Chemometrics, Institute for Environmental and Human Health Protection, Faculty of Chemistry, University of Gdansk, Gdansk, Poland.
b. Interdisciplinary Nanotoxicity Center, Department of Chemistry and Biochemistry, Jackson State University, Jackson MS, USA.
c. Department of Coatings and Polymeric Materials, North Dakota State University, Fargo, ND, USA.
†corresponding authors:
jerzy@icnanotox.org
bakhtiyor.rasulev@ndsu.edu

## Sheet: initial data
Nanoparticle	Mode of action	Assay	Type of the cell	Time of exposition	Notes
Al2O3	viability test	Minimum Inhibitory Concentration Assay	Escherichia coli	2 hours	dark conditions
Bi2O3	viability test	Minimum Inhibitory Concentration Assay	Escherichia coli	2 hours	dark conditions
CoO	viability test	Minimum Inhibitory Concentration Assay	Escherichia coli	2 hours	dark conditions
Cr2O3	viability test	Minimum Inhibitory Concentration Assay	Escherichia coli	2 hours	dark conditions
CuO	viability test	Minimum Inhibitory Concentration Assay	Escherichia coli	2 hours	dark conditions
Fe2O3	viability test	Minimum Inhibitory Concentration Assay	Escherichia coli	2 hours	dark conditions
In2O3	viability test	Minimum Inhibitory Concentration Assay	Escherichia coli	2 hours	dark conditions
La2O3	viability test	Minimum Inhibitory Concentration Assay	Escherichia coli	2 hours	dark conditions
NiO	viability test	Minimum Inhibitory Concentration Assay	Escherichia coli	2 hours	dark conditions
Sb2O3	viability test	Minimum Inhibitory Concentration Assay	Escherichia coli	2 hours	dark conditions
SiO2	viability test	Minimum Inhibitory Concentration Assay	Escherichia coli	2 hours	dark conditions
SnO2	viability test	Minimum Inhibitory Concentration Assay	Escherichia coli	2 hours	dark conditions
TiO2	viability test	Minimum Inhibitory Concentration Assay	Escherichia coli	2 hours	dark conditions
V2O3	viability test	Minimum Inhibitory Concentration Assay	Escherichia coli	2 hours	dark conditions
Y2O3	viability test	Minimum Inhibitory Concentration Assay	Escherichia coli	2 hours	dark conditions
ZnO	viability test	Minimum Inhibitory Concentration Assay	Escherichia coli	2 hours	dark conditions
ZrO2	viability test	Minimum Inhibitory Concentration Assay	Escherichia coli	2 hours	dark conditions
Al2O3	viability test	Minimum Inhibitory Concentration Assay	Escherichia coli	30 minutes	dark conditions
Bi2O3	viability test	Minimum Inhibitory Concentration Assay	Escherichia coli	30 minutes	dark conditions
CoO	viability test	Minimum Inhibitory Concentration Assay	Escherichia coli	30 minutes	dark conditions
Cr2O3	viability test	Minimum Inhibitory Concentration Assay	Escherichia coli	30 minutes	dark conditions
CuO	viability test	Minimum Inhibitory Concentration Assay	Escherichia coli	30 minutes	dark conditions
Fe2O3	viability test	Minimum Inhibitory Concentration Assay	Escherichia coli	30 minutes	dark conditions
In2O3	viability test	Minimum Inhibitory Concentration Assay	Escherichia coli	30 minutes	dark conditions
La2O3	viability test	Minimum Inhibitory Concentration Assay	Escherichia coli	30 minutes	dark conditions
NiO	viability test	Minimum Inhibitory Concentration Assay	Escherichia coli	30 minutes	dark conditions
Sb2O3	viability test	Minimum Inhibitory Concentration Assay	Escherichia coli	30 minutes	dark conditions
SiO2	viability test	Minimum Inhibitory Concentration Assay	Escherichia coli	30 minutes	dark conditions
SnO2	viability test	Minimum Inhibitory Concentration Assay	Escherichia coli	30 minutes	dark conditions
TiO2	viability test	Minimum Inhibitory Concentration Assay	Escherichia coli	30 minutes	dark conditions
V2O3	viability test	Minimum Inhibitory Concentration Assay	Escherichia coli	30 minutes	dark conditions
Y2O3	viability test	Minimum Inhibitory Concentration Assay	Escherichia coli	30 minutes	dark conditions
ZnO	viability test	Minimum Inhibitory Concentration Assay	Escherichia coli	30 minutes	dark conditions
ZrO2	viability test	Minimum Inhibitory Concentration Assay	Escherichia coli	30 minutes	dark conditions
Al2O3	viability test	Minimum Inhibitory Concentration Assay	Escherichia coli	30 minutes	photo-induced conditions
Bi2O3	viability test	Minimum Inhibitory Concentration Assay	Escherichia coli	30 minutes	photo-induced conditions
CoO	viability test	Minimum Inhibitory Concentration Assay	Escherichia coli	30 minutes	photo-induced conditions
Cr2O3	viability test	Minimum Inhibitory Concentration Assay	Escherichia coli	30 minutes	photo-induced conditions
CuO	viability test	Minimum Inhibitory Concentration Assay	Escherichia coli	30 minutes	photo-induced conditions
Fe2O3	viability test	Minimum Inhibitory Concentration Assay	Escherichia coli	30 minutes	photo-induced conditions
In2O3	viability test	Minimum Inhibitory Concentration Assay	Escherichia coli	30 minutes	photo-induced conditions
La2O3	viability test	Minimum Inhibitory Concentration Assay	Escherichia coli	30 minutes	photo-induced conditions
NiO	viability test	Minimum Inhibitory Concentration Assay	Escherichia coli	30 minutes	photo-induced conditions
Sb2O3	viability test	Minimum Inhibitory Concentration Assay	Escherichia coli	30 minutes	photo-induced conditions
SiO2	viability test	Minimum Inhibitory Concentration Assay	Escherichia coli	30 minutes	photo-induced conditions
SnO2	viability test	Minimum Inhibitory Concentration Assay	Escherichia coli	30 minutes	photo-induced conditions
TiO2	viability test	Minimum Inhibitory Concentration Assay	Escherichia coli	30 minutes	photo-induced conditions
V2O3	viability test	Minimum Inhibitory Concentration Assay	Escherichia coli	30 minutes	photo-induced conditions
Y2O3	viability test	Minimum Inhibitory Concentration Assay	Escherichia coli	30 minutes	photo-induced conditions
ZnO	viability test	Minimum Inhibitory Concentration Assay	Escherichia coli	30 minutes	photo-induced conditions
ZrO2	viability test	Minimum Inhibitory Concentration Assay	Escherichia coli	30 minutes	photo-induced conditions
Al2O3	growth inhibition	Minimum Inhibitory Concentration Assay	Escherichia coli	24 hours	dark conditions
CeO2	growth inhibition	Minimum Inhibitory Concentration Assay	Escherichia coli	24 hours	dark conditions
Co3O4	growth inhibition	Minimum Inhibitory Concentration Assay	Escherichia coli	24 hours	dark conditions
CoO	growth inhibition	Minimum Inhibitory Concentration Assay	Escherichia coli	24 hours	dark conditions
Cr2O3	growth inhibition	Minimum Inhibitory Concentration Assay	Escherichia coli	24 hours	dark conditions
CuO	growth inhibition	Minimum Inhibitory Concentration Assay	Escherichia coli	24 hours	dark conditions
Fe2O3	growth inhibition	Minimum Inhibitory Concentration Assay	Escherichia coli	24 hours	dark conditions
Fe3O4	growth inhibition	Minimum Inhibitory Concentration Assay	Escherichia coli	24 hours	dark conditions
Gd2O3	growth inhibition	Minimum Inhibitory Concentration Assay	Escherichia coli	24 hours	dark conditions
HfO2	growth inhibition	Minimum Inhibitory Concentration Assay	Escherichia coli	24 hours	dark conditions
In2O3	growth inhibition	Minimum Inhibitory Concentration Assay	Escherichia coli	24 hours	dark conditions
La2O3	growth inhibition	Minimum Inhibitory Concentration Assay	Escherichia coli	24 hours	dark conditions
Mn2O3	growth inhibition	Minimum Inhibitory Concentration Assay	Escherichia coli	24 hours	dark conditions
Ni2O3	growth inhibition	Minimum Inhibitory Concentration Assay	Escherichia coli	24 hours	dark conditions
NiO	growth inhibition	Minimum Inhibitory Concentration Assay	Escherichia coli	24 hours	dark conditions
Sb2O3	growth inhibition	Minimum Inhibitory Concentration Assay	Escherichia coli	24 hours	dark conditions
SiO2	growth inhibition	Minimum Inhibitory Concentration Assay	Escherichia coli	24 hours	dark conditions
SnO2	growth inhibition	Minimum Inhibitory Concentration Assay	Escherichia coli	24 hours	dark conditions
TiO2	growth inhibition	Minimum Inhibitory Concentration Assay	Escherichia coli	24 hours	dark conditions
WO3	growth inhibition	Minimum Inhibitory Concentration Assay	Escherichia coli	24 hours	dark conditions
Y2O3	growth inhibition	Minimum Inhibitory Concentration Assay	Escherichia coli	24 hours	dark conditions
Yb2O3	growth inhibition	Minimum Inhibitory Concentration Assay	Escherichia coli	24 hours	dark conditions
ZnO	growth inhibition	Minimum Inhibitory Concentration Assay	Escherichia coli	24 hours	dark conditions
ZrO2	growth inhibition	Minimum Inhibitory Concentration Assay	Escherichia coli	24 hours	dark conditions
Al2O3	viability test	CytoTox-Glo Cytotoxicity Assay	HaCaT cells	24 hours	dark conditions
Bi2O3	viability test	CytoTox-Glo Cytotoxicity Assay	HaCaT cells	24 hours	dark conditions
CoO	viability test	CytoTox-Glo Cytotoxicity Assay	HaCaT cells	24 hours	dark conditions
Cr2O3	viability test	CytoTox-Glo Cytotoxicity Assay	HaCaT cells	24 hours	dark conditions
Fe2O3	viability test	CytoTox-Glo Cytotoxicity Assay	HaCaT cells	24 hours	dark conditions
In2O3	viability test	CytoTox-Glo Cytotoxicity Assay	HaCaT cells	24 hours	dark conditions
La2O3	viability test	CytoTox-Glo Cytotoxicity Assay	HaCaT cells	24 hours	dark conditions
Mn2O3	viability test	CytoTox-Glo Cytotoxicity Assay	HaCaT cells	24 hours	dark conditions
NiO	viability test	CytoTox-Glo Cytotoxicity Assay	HaCaT cells	24 hours	dark conditions
Sb2O3	viability test	CytoTox-Glo Cytotoxicity Assay	HaCaT cells	24 hours	dark conditions
SiO2	viability test	CytoTox-Glo Cytotoxicity Assay	HaCaT cells	24 hours	dark conditions
SnO2	viability test	CytoTox-Glo Cytotoxicity Assay	HaCaT cells	24 hours	dark conditions
TiO2	viability test	CytoTox-Glo Cytotoxicity Assay	HaCaT cells	24 hours	dark conditions
V2O3	viability test	CytoTox-Glo Cytotoxicity Assay	HaCaT cells	24 hours	dark conditions
Y2O3	viability test	CytoTox-Glo Cytotoxicity Assay	HaCaT cells	24 hours	dark conditions
ZnO	viability test	CytoTox-Glo Cytotoxicity Assay	HaCaT cells	24 hours	dark conditions
ZrO2	viability test	CytoTox-Glo Cytotoxicity Assay	HaCaT cells	24 hours	dark conditions
WO3	viability test	CytoTox-Glo Cytotoxicity Assay	HaCaT cells	24 hours	dark conditions
Co3O4	growth inhibition	bioluminescence inhibition assay	Photobacterium phosphoreum	12 hours
Cr2O3	growth inhibition	bioluminescence inhibition assay	Photobacterium phosphoreum	12 hours
CuO	growth inhibition	bioluminescence inhibition assay	Photobacterium phosphoreum	12 hours
Fe2O3	growth inhibition	bioluminescence inhibition assay	Photobacterium phosphoreum	12 hours
Fe3O4	growth inhibition	bioluminescence inhibition assay	Photobacterium phosphoreum	12 hours
Nd2O3	growth inhibition	bioluminescence inhibition assay	Photobacterium phosphoreum	12 hours
NiO	growth inhibition	bioluminescence inhibition assay	Photobacterium phosphoreum	12 hours
Pr6O11	growth inhibition	bioluminescence inhibition assay	Photobacterium phosphoreum	12 hours
WO3	growth inhibition	bioluminescence inhibition assay	Photobacterium phosphoreum	12 hours
ZnO	growth inhibition	bioluminescence inhibition assay	Photobacterium phosphoreum	12 hours
Al2O3	viability test	NRU assay	A549 cells	24 hours
Co3O4	viability test	NRU assay	A549 cells	24 hours
CuO	viability test	NRU assay	A549 cells	24 hours
Fe3O4	viability test	NRU assay	A549 cells	24 hours
MgO	viability test	NRU assay	A549 cells	24 hours
Mn3O4	viability test	NRU assay	A549 cells	24 hours
Sb2O3	viability test	NRU assay	A549 cells	24 hours
SiO2	viability test	NRU assay	A549 cells	24 hours
TiO2	viability test	NRU assay	A549 cells	24 hours
WO3	viability test	NRU assay	A549 cells	24 hours
ZnO	viability test	NRU assay	A549 cells	24 hours
Al2O3	viability test	NRU assay	Caco2 cells	24 hours
Co3O4	viability test	NRU assay	Caco2 cells	24 hours
CuO	viability test	NRU assay	Caco2 cells	24 hours
Fe3O4	viability test	NRU assay	Caco2 cells	24 hours
MgO	viability test	NRU assay	Caco2 cells	24 hours
Mn3O4	viability test	NRU assay	Caco2 cells	24 hours
Sb2O3	viability test	NRU assay	Caco2 cells	24 hours
SiO2	viability test	NRU assay	Caco2 cells	24 hours
WO3	viability test	NRU assay	Caco2 cells	24 hours
ZnO	viability test	NRU assay	Caco2 cells	24 hours
Al2O3	viability test	NRU assay	Balb/c 3T3	24 hours
Co3O4	viability test	NRU assay	Balb/c 3T3	24 hours
CuO	viability test	NRU assay	Balb/c 3T3	24 hours
Fe3O4	viability test	NRU assay	Balb/c 3T3	24 hours
MgO	viability test	NRU assay	Balb/c 3T3	24 hours
Mn3O4	viability test	NRU assay	Balb/c 3T3	24 hours
Sb2O3	viability test	NRU assay	Balb/c 3T3	24 hours
SiO2	viability test	NRU assay	Balb/c 3T3	24 hours
WO3	viability test	NRU assay	Balb/c 3T3	24 hours
ZnO	viability test	NRU assay	Balb/c 3T3	24 hours
Co3O4	viability test	resazurin fluorescence assay	A549 cells	12 hours
CuO	viability test	resazurin fluorescence assay	A549 cells	12 hours
Mn3O4	viability test	resazurin fluorescence assay	A549 cells	12 hours
Sb2O3	viability test	resazurin fluorescence assay	A549 cells	12 hours
ZnO	viability test	resazurin fluorescence assay	A549 cells	12 hours
TiO2	viability test	resazurin fluorescence assay	A549 cells	12 hours
Co3O4	viability test	resazurin fluorescence assay	Caco2 cells	12 hours
CuO	viability test	resazurin fluorescence assay	Caco2 cells	12 hours
Mn3O4	viability test	resazurin fluorescence assay	Caco2 cells	12 hours
Sb2O3	viability test	resazurin fluorescence assay	Caco2 cells	12 hours
TiO2	viability test	resazurin fluorescence assay	Caco2 cells	12 hours
Co3O4	viability test	resazurin fluorescence assay	Balb/c 3T3	12 hours
CuO	viability test	resazurin fluorescence assay	Balb/c 3T3	12 hours
Mn3O4	viability test	resazurin fluorescence assay	Balb/c 3T3	12 hours
Sb2O3	viability test	resazurin fluorescence assay	Balb/c 3T3	12 hours
ZnO	viability test	resazurin fluorescence assay	Balb/c 3T3	12 hours
TiO2	viability test	resazurin fluorescence assay	Balb/c 3T3	12 hours
Al2O3	growth inhibition	bioluminescence inhibition assay	Vibrio fischeri	30 minutes
Co3O4	growth inhibition	bioluminescence inhibition assay	Vibrio fischeri	30 minutes
CuO	growth inhibition	bioluminescence inhibition assay	Vibrio fischeri	30 minutes
Fe3O4	growth inhibition	bioluminescence inhibition assay	Vibrio fischeri	30 minutes
MgO	growth inhibition	bioluminescence inhibition assay	Vibrio fischeri	30 minutes
Mn3O4	growth inhibition	bioluminescence inhibition assay	Vibrio fischeri	30 minutes
Sb2O3	growth inhibition	bioluminescence inhibition assay	Vibrio fischeri	30 minutes
SiO2	growth inhibition	bioluminescence inhibition assay	Vibrio fischeri	30 minutes
TiO2	growth inhibition	bioluminescence inhibition assay	Vibrio fischeri	30 minutes
WO3	growth inhibition	bioluminescence inhibition assay	Vibrio fischeri	30 minutes
ZnO	growth inhibition	bioluminescence inhibition assay	Vibrio fischeri	30 minutes
Al2O3	growth inhibition	growth inhibition assay	Pseudokirchneriella subcapitata	72 hours	dark conditions
Co3O4	growth inhibition	growth inhibition assay	Pseudokirchneriella subcapitata	72 hours	dark conditions
CuO	growth inhibition	growth inhibition assay	Pseudokirchneriella subcapitata	72 hours	dark conditions
Fe3O4	growth inhibition	growth inhibition assay	Pseudokirchneriella subcapitata	72 hours	dark conditions
MgO	growth inhibition	growth inhibition assay	Pseudokirchneriella subcapitata	72 hours	dark conditions
Mn3O4	growth inhibition	growth inhibition assay	Pseudokirchneriella subcapitata	72 hours	dark conditions
Sb2O3	growth inhibition	growth inhibition assay	Pseudokirchneriella subcapitata	72 hours	dark conditions
SiO2	growth inhibition	growth inhibition assay	Pseudokirchneriella subcapitata	72 hours	dark conditions
TiO2	growth inhibition	growth inhibition assay	Pseudokirchneriella subcapitata	72 hours	dark conditions
WO3	growth inhibition	growth inhibition assay	Pseudokirchneriella subcapitata	72 hours	dark conditions
ZnO	growth inhibition	growth inhibition assay	Pseudokirchneriella subcapitata	72 hours	dark conditions
Al2O3	viability test	ATP assay	Tetrahymena thermophile	24 hours	dark conditions
Co3O4	viability test	ATP assay	Tetrahymena thermophile	24 hours	dark conditions
CuO	viability test	ATP assay	Tetrahymena thermophile	24 hours	dark conditions
Fe3O4	viability test	ATP assay	Tetrahymena thermophile	24 hours	dark conditions
MgO	viability test	ATP assay	Tetrahymena thermophile	24 hours	dark conditions
Mn3O4	viability test	ATP assay	Tetrahymena thermophile	24 hours	dark conditions
Sb2O3	viability test	ATP assay	Tetrahymena thermophile	24 hours	dark conditions
SiO2	viability test	ATP assay	Tetrahymena thermophile	24 hours	dark conditions
TiO2	viability test	ATP assay	Tetrahymena thermophile	24 hours	dark conditions
WO3	viability test	ATP assay	Tetrahymena thermophile	24 hours	dark conditions
ZnO	viability test	ATP assay	Tetrahymena thermophile	24 hours	dark conditions
